# Supplementary material for: Acute sleep deprivation increases inflammation and aggravates heart failure after myocardial infarction
Source: PubMed Central journal article supplement — J Sleep Res. 2022 Jul 3;31(6):e13679. doi: 10.1111/jsr.13679 (PMC9786274; doi:10.1111/jsr.13679), 2022-07-03
Supplement: JSR-31-e13679-s001.pdf [file JSR-31-e13679-s001.pdf]

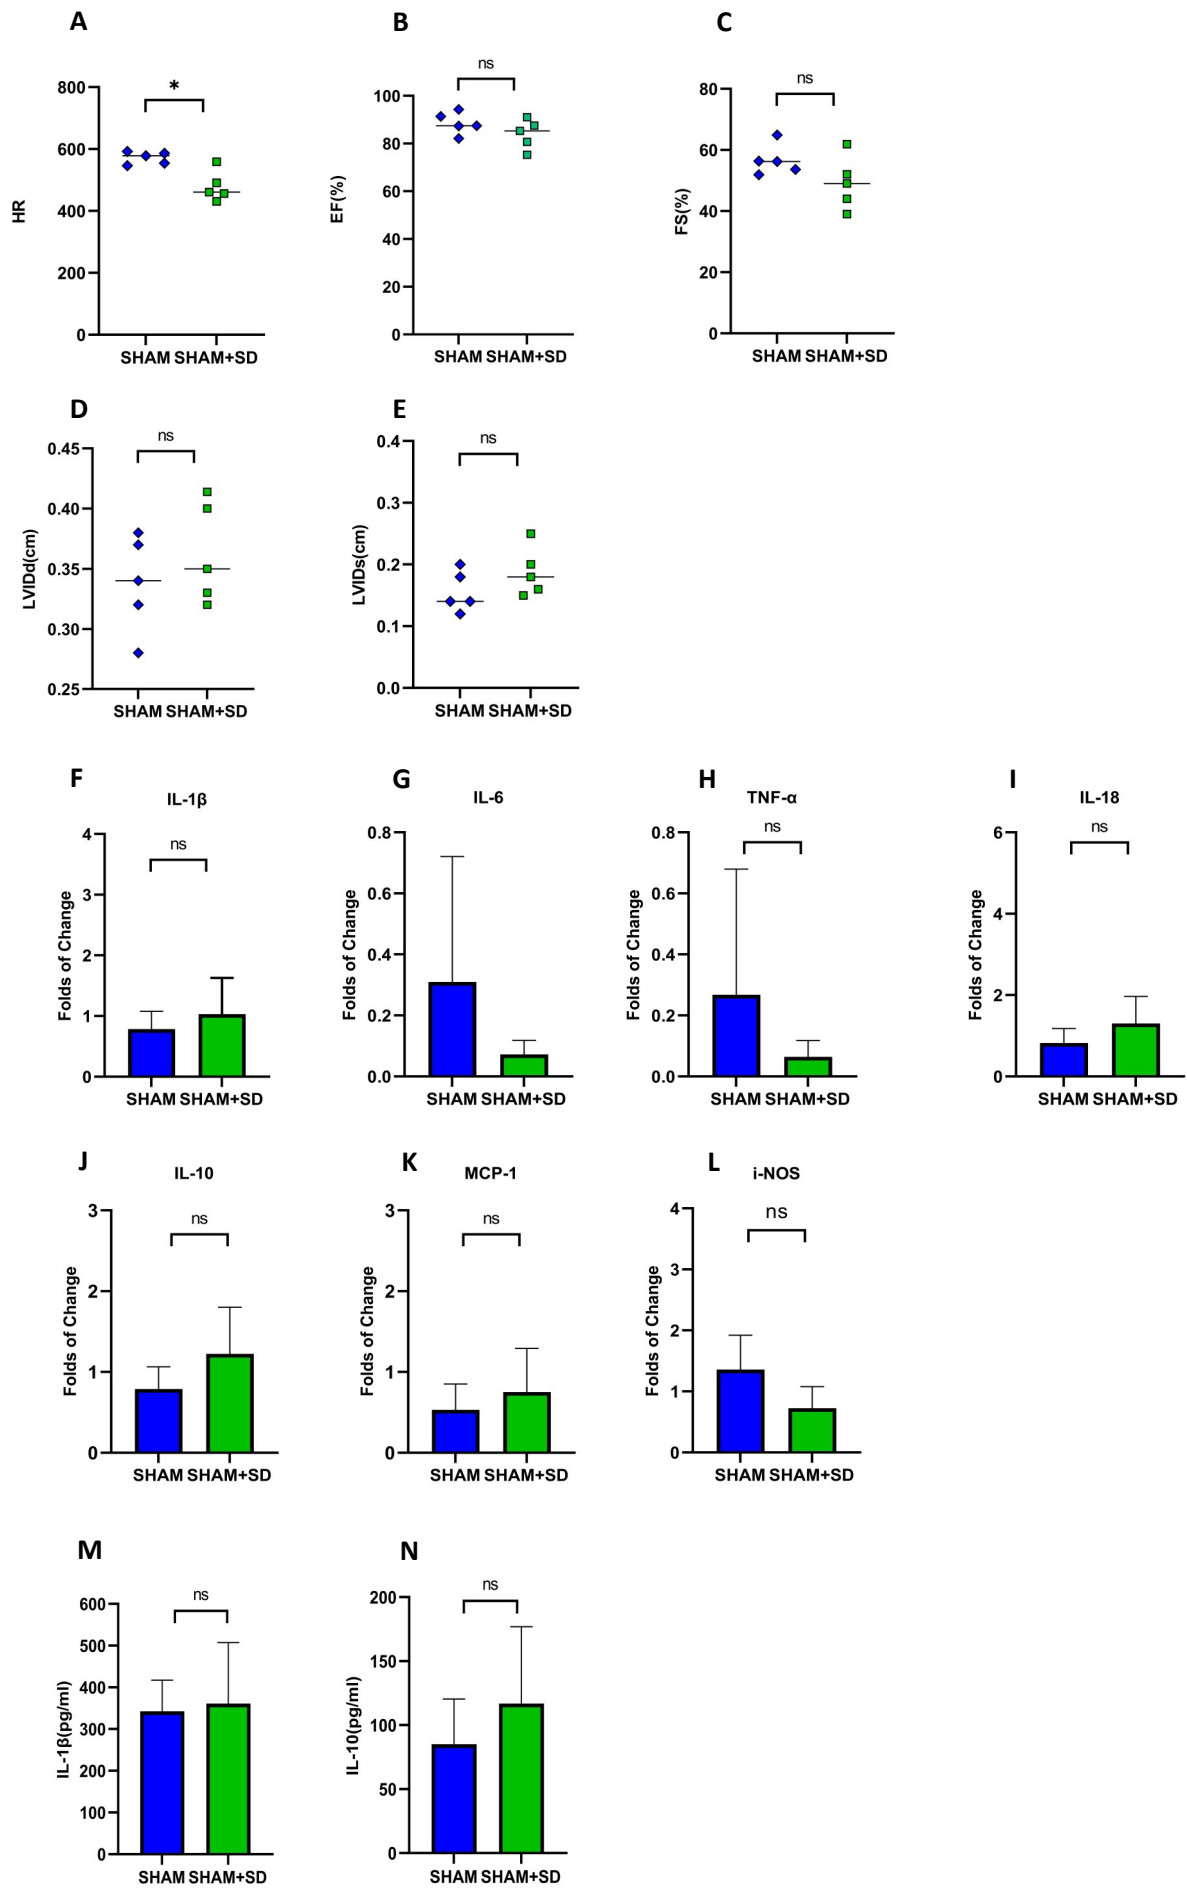

## Supplementary figure legend

### Supplementary Figure 1. Sleep deprivation cause little influence on the left ventricular function and inflammatory cytokine production of Sham mice.

(A) The comparison of the HRs of mice in the Sham and Sham+SD groups is shown. (B) The comparison of the EF of mice in the Sham and Sham+SD groups is shown. (n = 5). (C) The comparison of FS in mice from the Sham and Sham+SD groups is shown. (n = 5). (D) The comparison of the LVIDd of the Sham and Sham+SD groups is shown. (n = 5). (E) The comparison of the LVIDs in mice from the Sham and Sham+SD groups is shown. test (n = 5). (F) The comparison of IL-1 $\beta$  mRNA levels in the left ventricles of mice in the Sham and Sham+SD groups is shown. (n = 5). (G) The comparison of IL-6 mRNA levels in the left ventricles of mice in the Sham and Sham+SD groups is shown. (n = 5). (H) The comparison of TNF- $\alpha$  mRNA levels in the left ventricles of mice in the Sham and Sham+SD groups is shown. (n = 5). (I) The comparison of IL-18 mRNA levels in the left ventricles of mice in the Sham and Sham+SD groups is shown. (n = 5). (J) The comparison of IL-10 mRNA levels in the left ventricles of mice in the Sham and Sham+SD groups is shown. (n = 5). (K) The comparison of MCP-1 mRNA levels in the left ventricles of mice in the Sham and Sham+SD groups is shown. (n = 5). (L) The comparison of iNOS mRNA levels in the left ventricles of mice in the Sham and Sham+SD groups is shown. (n = 5). (M) ELISA revealed increased levels of IL-1 $\beta$  in the left ventricles of mice in the LAD+SD group. (n = 5). (N) ELISA revealed increased levels of IL-10 in the left ventricles of mice in the LAD+SD group. (n = 5).
